# Supplementary material for: Microbes isolated from Saline-Alkali Soil of Northern Ningxia ： insight on microbial diversity and antibacterial activity
Source: Research Square preprint supplement (doi:10.21203/rs.3.rs-6277773/v1), 2025-04-02
Supplement: Supplementary file 1 [file 89f2f3fbbb3e4a24674b04f8.docx]

**Microbes isolated from Saline-Alkali Soil of Northern Ningxia：insight on microbial diversity and antibacterial activity**

**Xiao-li Ma*1,2 Jing-jing Tian1 Fan-fan Ding1 Zhi-bo Jiang1**

1 School of Chemistry and Chemical Engineering, North Minzu University, Yinchuan 750021, China

2 School of Pharmaceutical Sciences, Peking University, Beijing 100191, China

***Correspondence:**

Dr. Xiao-li Ma, Key Laboratory of Chemical Engineering and Technology of State Ethnic Affairs Commission, School of Chemistry and Chemical Engineering, North Minzu University, Yinchuan 750021, P.R., China; Email: mxl@nmu.edu.cn Tel: +86 951 2066204.

**Figure S1** Fungal plate growth status of soil sample

**
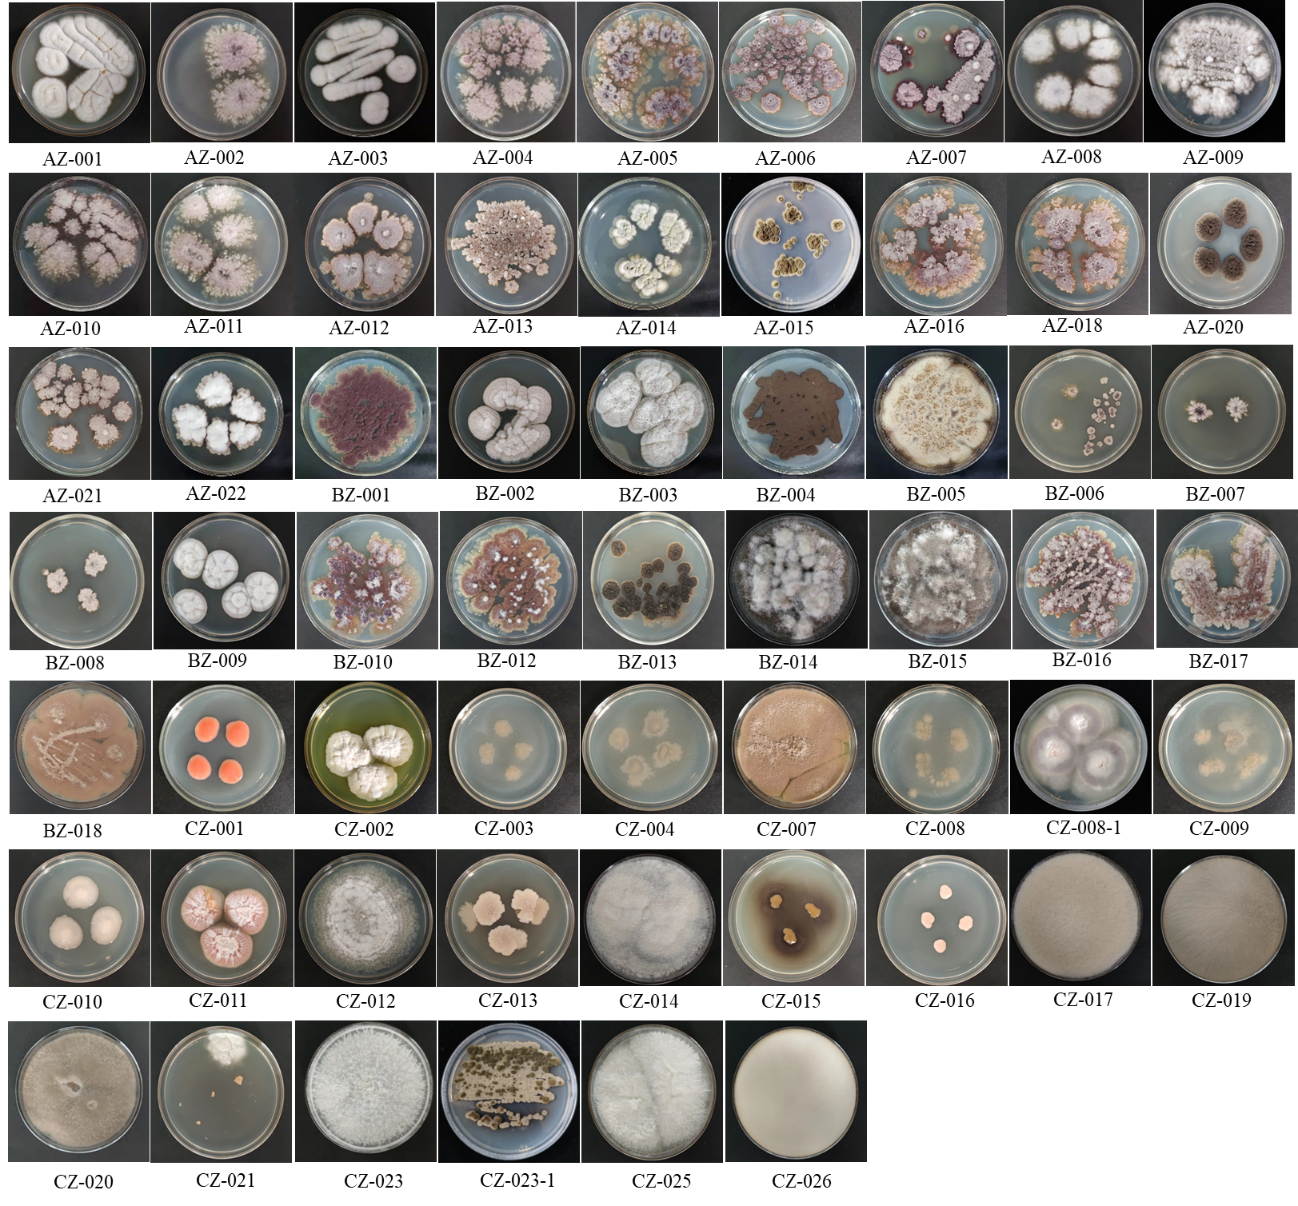
**

**Figure S2** Proportion of fungi by genus

**Figure S3** Phylogenetic tree of 38 strains of fungal


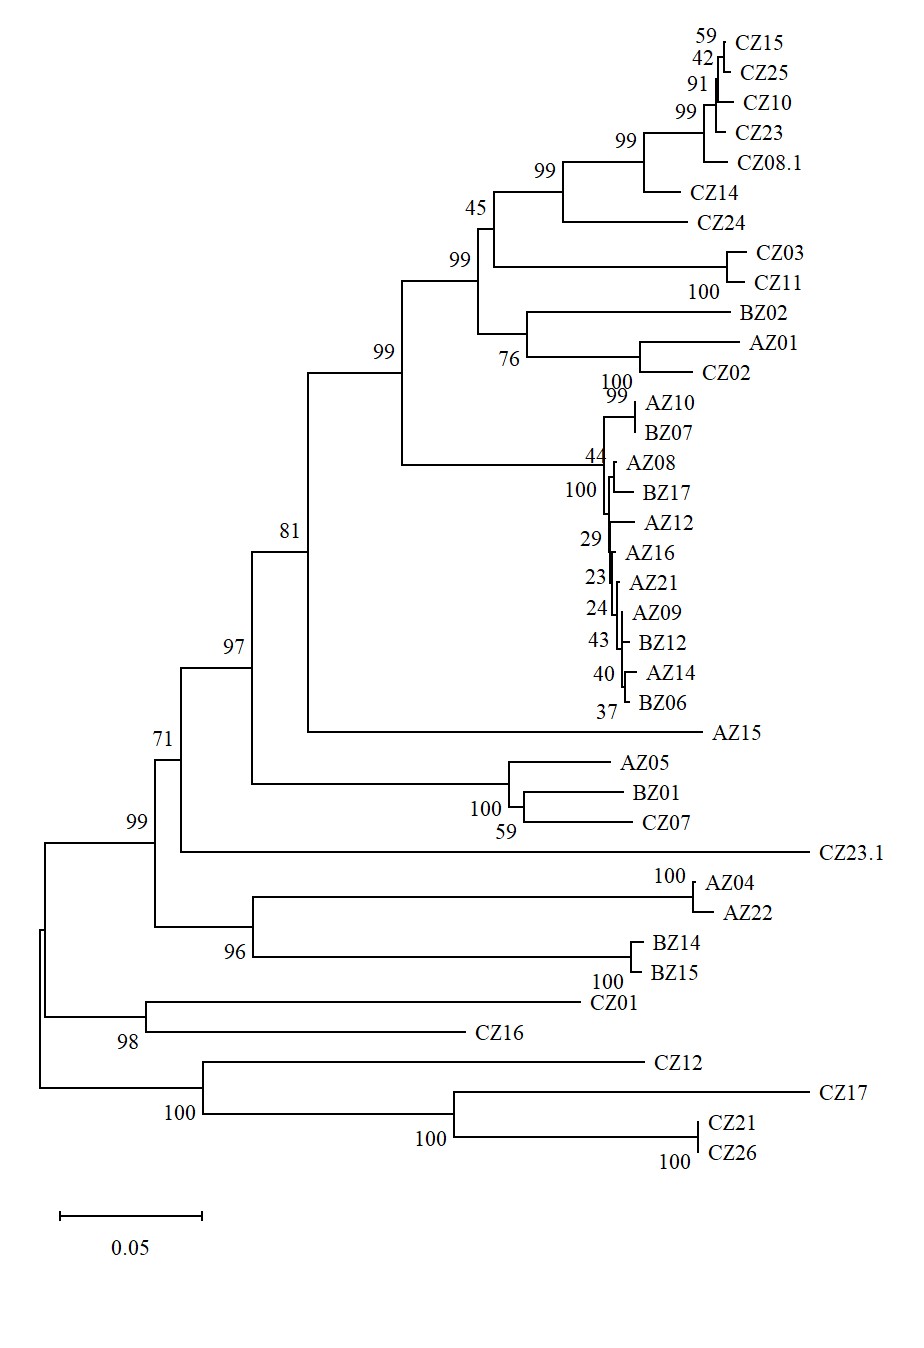


**Figure S4** Inhibitory activity of 20 strains of *Actinomycetes* against *S. aureus*


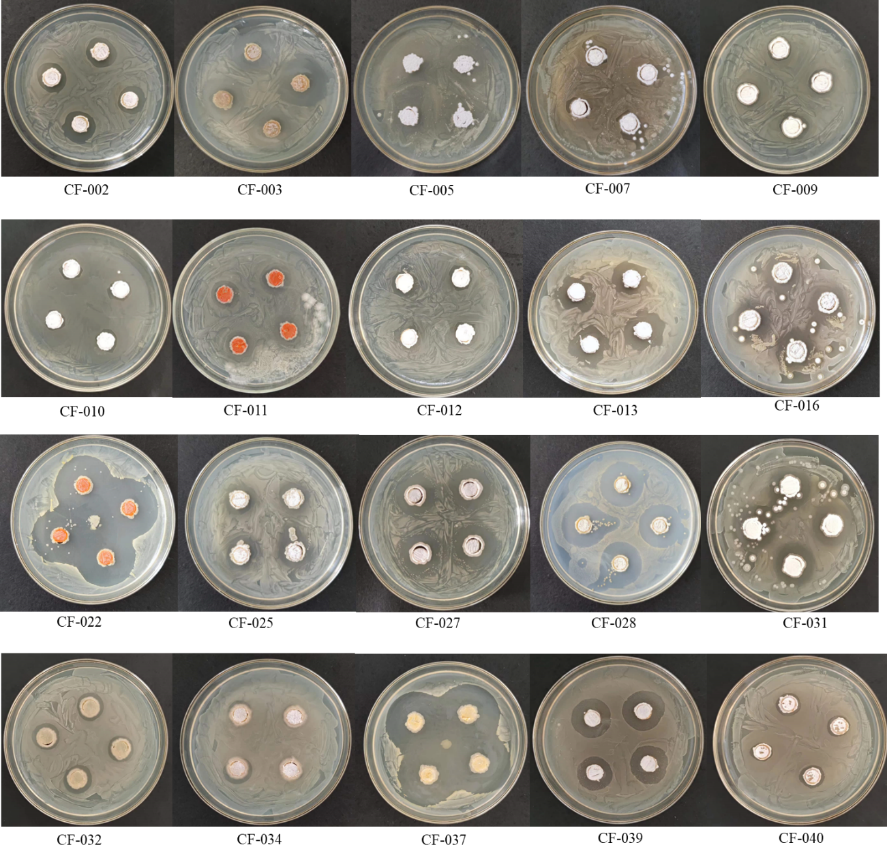


**Figure S5** Inhibitory activity of 35 strains of *Actinomycetes* against *P. vulgaris*

##
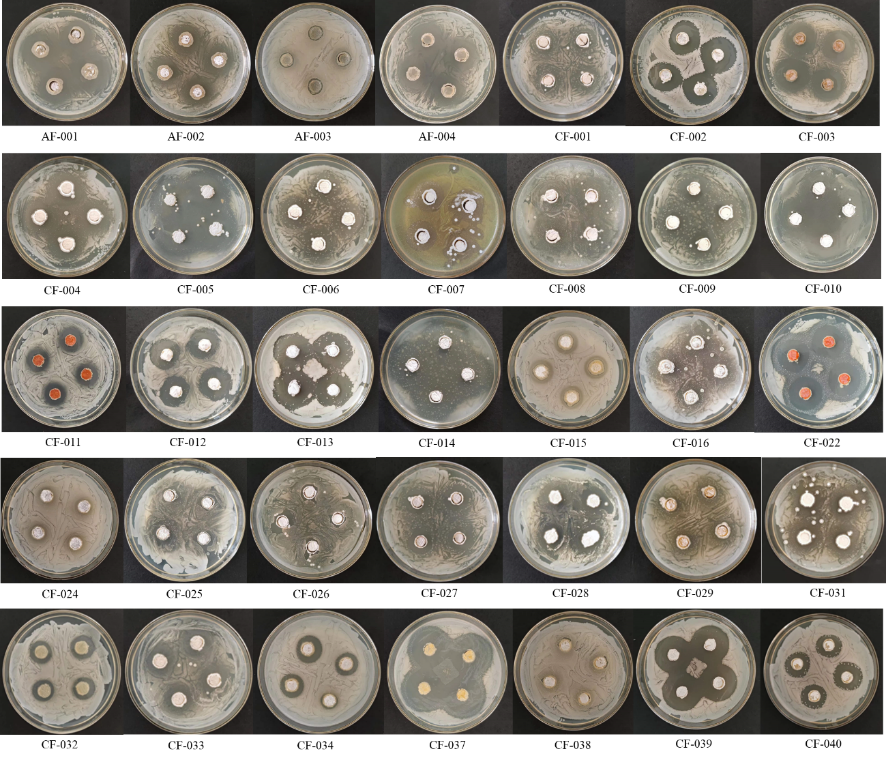


**Figure S6** Inhibitory activity of 14 strains of *Actinomycetes* on *C. albicans*.

##
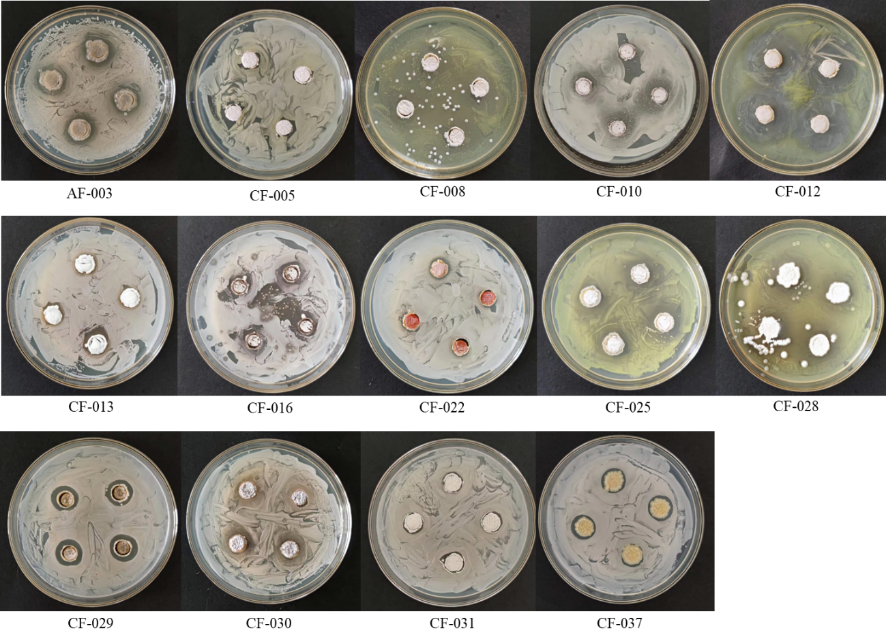


**Table S1** NCBI comparison of Fungal ITS sequence

| Strain No. | DNA identification results | Query  Coverage | Identities | Sequence ID |
| --- | --- | --- | --- | --- |
| AZ-001 | *Nigrosabulum globosum* | 96% | 95.46% | MH860723.1 |
| AZ-004 | *uncultured Ascomycota* | 33% | 99.36% | OW842641.1 |
| AZ-005 | *Penicillium oxalicum* | 98% | 99.64% | ON712135.1 |
| AZ-008 | *Chaetomium* sp*.* | 96% | 99.25% | MK361147.1 |
| AZ-009 | *Chaetomium* sp*..* | 95% | 99.25% | MK361147.1 |
| AZ-010 | *Chaetomium* sp*.* | 97% | 99.08% | MK361147.1 |
| AZ-012 | *Chaetomium* sp*.* | 95% | 99.62% | MK361147.1 |
| AZ-014 | *Chaetomium* sp*.* | 96% | 99.25% | MK361147.1 |
| AZ-015 | *Cladosporium limoniforme* | 98% | 99.60% | OR673657.1 |
| AZ-016 | *Chaetomium* sp*.* | 95% | 99.44% | MK361147.1 |
| AZ-021 | *Chaetomium* sp*.* | 95% | 99.44% | MK361147.1 |
| AZ-022 | *uncultured A.* | 28% | 99.66% | OW842641.1 |
| BZ-001 | *Aspergillus fumigatus* | 97% | 99.47% | OP681417.1 |
| BZ-002 | *Acremonium* sp*.* | 94% | 96.47% | MF189903.1 |
| BZ-006 | *Chaetomium* sp*..* | 95% | 99.62% | MK361147.1 |
| BZ-007 | *Chaetomium* sp*.* | 98% | 98.91% | MK361147.1 |
| BZ-012 | *Chaetomium* sp*.* | 96% | 99.62% | MK361147.1 |
| BZ-014 | *Alternaria chlamydosporigena* | 97% | 99.47% | KC466540.1 |
| BZ-015 | *Alternaria chlamydosporigena* | 96% | 99.28% | KC466540.1 |
| BZ-017 | *Chaetomium* sp*.* | 94% | 99.62% | MK361147.1 |
| CZ-001 | *Rhodotorula mucilaginosa* | 98% | 99.32% | [JO425393.1](https://www.ncbi.nlm.nih.gov/nucleotide/NR_036886.1?report=genbank&log$=nuclalign&blast_rank=1&RID=VAN30WY601N) |
| CZ-002 | *A. chrysogenum* | 96% | 99.63% | MH858636.1 |
| CZ-003 | *Sarocladium strictum* | 95% | 100.00% | MK361137.1 |
| CZ-007 | *Aspergillus terreus* | 98% | 99.13% | MF972904.1 |
| CZ-008-1 | *Fusarium andiyazi* | 97% | 99.41% | OQ818159.1 |
| CZ-010 | *Fusarium andiyazi* | 96% | 99.42% | OQ818159.1 |
| CZ-011 | *S.strictum* | 98% | 99.11% | EU520182.1 |
| CZ-012 | *Mortierella alpina* | 95% | 99.84% | KU738456.1 |
| CZ-014 | *Fusarium proliferatum* | 99% | 99.25% | ON527495.1 |
| CZ-015 | *Fusarium andiyazi* | 98% | 99.03% | OQ818159.1 |
| CZ-016 | *Vishniacozyma tephrensis* | 96% | 99.58% | [MN128859.1](https://www.ncbi.nlm.nih.gov/nucleotide/NR_025242.1?report=genbank&log$=nuclalign&blast_rank=1&RID=VAPV7H9F016) |
| CZ-017 | *Actinomucor elegans* | 96% | 99.69% | FJ176396.1 |
| CZ-021 | *Sarocladium strictum* | 95% | 99.63% | MK361137.1 |
| CZ-023 | *F. fujikuroi* | 98% | 96.60% | [MH084746.1](https://www.ncbi.nlm.nih.gov/nucleotide/NR_112256.1?report=genbank&log$=nuclalign&blast_rank=1&RID=VARMY6ND01N) |
| CZ-023-1 | *Scolecobasidium tshawytschae* | 97% | 99.06% | MZ503737.1 |
| CZ-024 | *Fusarium solani* | 97% | 99.44% | OQ818125.1 |
| CZ-025 | *Fusarium verticillioides* | 98% | 99.42% | ON712507.1 |
| CZ-026 | *Mucor* sp*.* | 95% | 99.66% | MT365973.1 |

**Table S2** Inhibitory effect of different concentrations of standards on *S. aureus*, *P. vulgaris* and *C. albicans*

| Antibiotics/（μg/mL） | Bacteriostatic diameter/cm | | | | | | | | | |
| --- | --- | --- | --- | --- | --- | --- | --- | --- | --- | --- |
| 1 000 | 800 | 600 | 400 | 200 | 100 | 20 | 10 | 5 | 2.5 |
| vancomycin hydrochloride | 1.25 | 1.2 | 1.1 | 1 | 0.9 | 0.95 | 0.9 | 0.85 | 0 | 0 |
| ofloxacin | 3.3 | 3.1 | 3.3 | 3.3 | 3 | 1.8 | 1.5 | 1.4 | 1.3 | 1.1 |
| amphotericin B | 1.3 | 1.3 | 1.3 | 1.3 | 1.2 | 1.8 | 1.5 | 1.3 | 1.2 | 1 |

Note: The diameter of the Oxford cup is 0.8 cm. The blank control are sterile water and dimethyl sulfoxide.
